# Supplementary material for: Investors' losses: who foots the bill?
Source: Springer Nature journal article supplement (doi:10.1186/s12885-017-3940-y), 1993-07-01

**Fig S1.** Depth of coverage and method for detection of large insertion-deletion of exon using next-generation sequencing

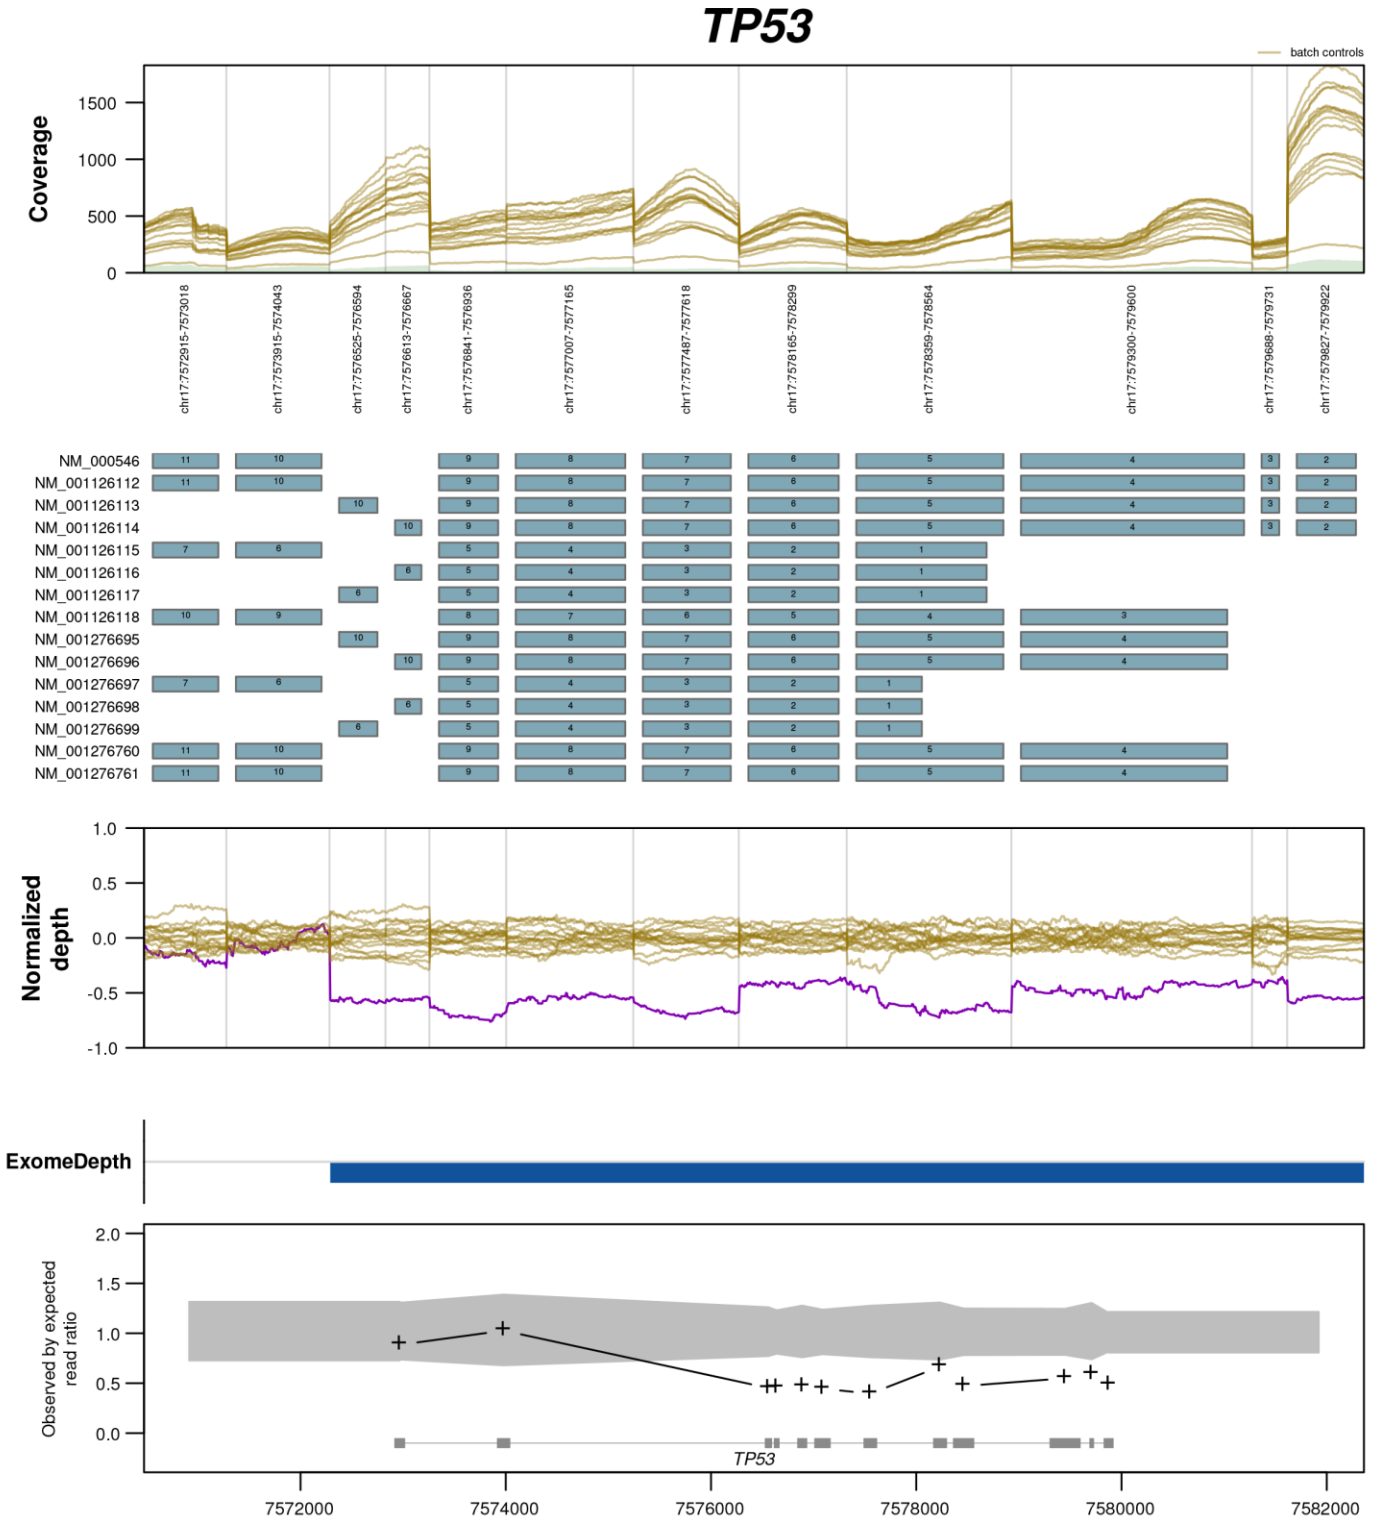





(C)

| MLPA Analysis Report - SoftGenetics           |                                                          |
|-----------------------------------------------|----------------------------------------------------------|
| Software: Genemarker V2.4.0                   | Analysis Type: MLPA                                      |
| Project: Untitled                             | Compare Type: MLPA Ratio                                 |
| Technician:                                   | Normalization By: Population Normalization (Adjusted)    |
| Report Time: 12/30/2016 - 17:13:43            | Quantification By: Peak Height                           |
| Panel: P240_A3_BRIP1                          | Classification: Loss < 0.65 <= Equivalent <= 1.30 < Gain |
| Control: 2016-12-30_NP16(CGW,XY)_P240_H02.fsa | Report Value Type: Peak Ratio                            |

2016-12-30\_161031-GD-06\_(8341731)\_P240\_F02.fsa

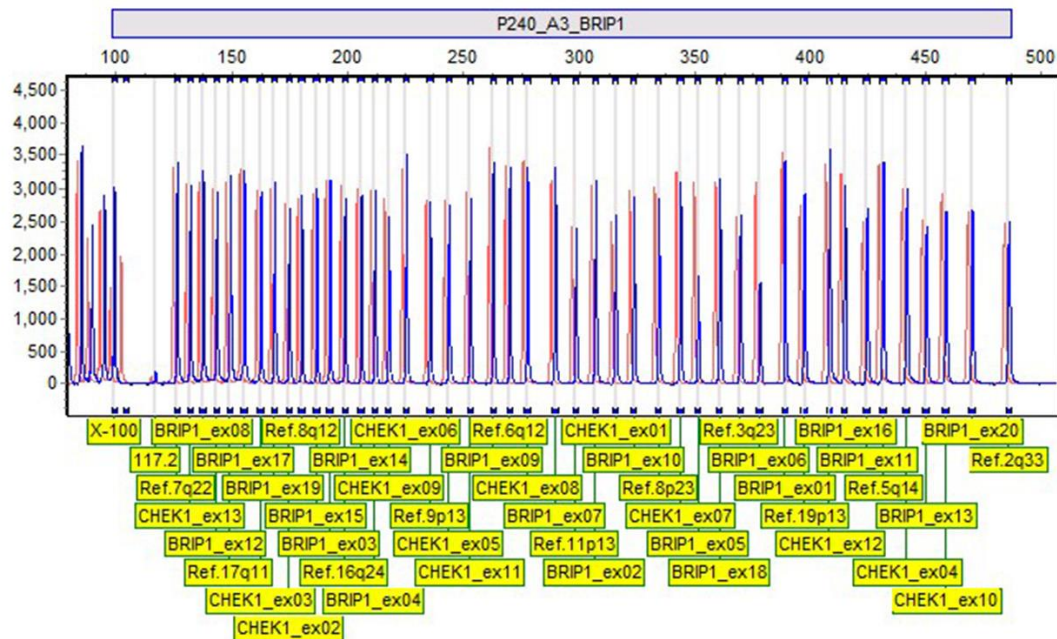

Sample Name: 161031-GD-06\_(8341731)\_P240  
 Machine: GA3130-1601-002  
 Run Time: 12/30/2016 - 13:51:37 -> 12/30/2016 - 14:43:27

|               |      |         |
|---------------|------|---------|
| Conclusion    |      |         |
|               | Date | Initial |
| Authorization |      |         |
| Authorization |      |         |

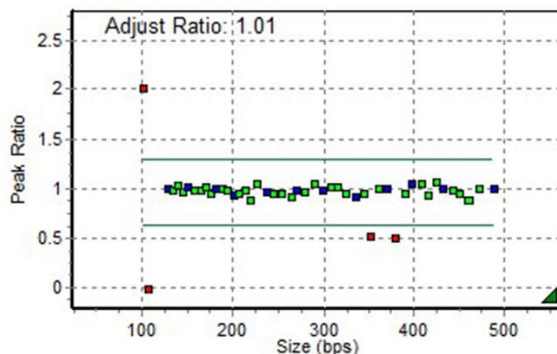

|    | Probe Name | Bin Size | 2016-12-30_161031-GD-06_(8341731) |
|----|------------|----------|-----------------------------------|
| 1  | X-100      | 100.0    | 2.032                             |
| 2  | Y-105      | 105.0    | 0.000                             |
| 3  | Ref.7q22   | 126.7    | 1.020                             |
| 4  | CHEK1_ex13 | 132.3    | 0.994                             |
| 5  | BRIP1_ex08 | 137.8    | 1.055                             |
| 6  | BRIP1_ex12 | 143.8    | 0.988                             |
| 7  | Ref.17q11  | 149.7    | 1.028                             |
| 8  | BRIP1_ex17 | 155.6    | 0.995                             |
| 9  | CHEK1_ex03 | 162.8    | 0.993                             |
| 10 | BRIP1_ex19 | 168.8    | 1.030                             |
| 11 | CHEK1_ex02 | 175.1    | 0.970                             |
| 12 | Ref.8q12   | 180.5    | 1.021                             |
| 13 | BRIP1_ex15 | 187.0    | 1.021                             |
| 14 | BRIP1_ex03 | 192.6    | 1.002                             |
| 15 | Ref.16q24  | 199.2    | 0.939                             |
| 16 | BRIP1_ex14 | 206.0    | 0.964                             |
| 17 | BRIP1_ex04 | 212.1    | 0.997                             |
| 18 | CHEK1_ex09 | 218.0    | 0.899                             |
| 19 | CHEK1_ex06 | 225.6    | 1.062                             |
| 20 | Ref.9p13   | 235.8    | 0.984                             |
| 21 | CHEK1_ex05 | 244.0    | 0.970                             |
| 22 | CHEK1_ex11 | 253.3    | 0.960                             |
| 23 | BRIP1_ex09 | 263.2    | 0.937                             |
| 24 | Ref.6q12   | 270.2    | 0.995                             |
| 25 | CHEK1_ex08 | 277.9    | 0.976                             |
| 26 | BRIP1_ex07 | 289.9    | 1.063                             |
| 27 | Ref.11p13  | 298.9    | 0.991                             |
| 28 | BRIP1_ex02 | 307.3    | 1.027                             |
| 29 | CHEK1_ex01 | 315.9    | 1.036                             |
| 30 | BRIP1_ex10 | 323.9    | 0.967                             |
| 31 | Ref.8p23   | 334.5    | 0.935                             |
| 32 | CHEK1_ex07 | 343.8    | 0.955                             |
| 33 | BRIP1_ex05 | 351.6    | 0.532                             |
| 34 | BRIP1_ex18 | 360.8    | 1.012                             |
| 35 | Ref.3q23   | 369.8    | 1.006                             |
| 36 | BRIP1_ex06 | 378.1    | 0.504                             |
| 37 | BRIP1_ex01 | 389.4    | 0.969                             |
| 38 | Ref.19p13  | 397.9    | 1.070                             |
| 39 | CHEK1_ex12 | 408.8    | 1.068                             |
| 40 | BRIP1_ex16 | 415.4    | 0.946                             |
| 41 | BRIP1_ex11 | 425.0    | 1.084                             |
| 42 | Ref.5q14   | 431.9    | 1.007                             |
| 43 | CHEK1_ex04 | 442.0    | 0.995                             |
| 44 | BRIP1_ex13 | 450.6    | 0.963                             |
| 45 | CHEK1_ex10 | 459.1    | 0.903                             |
| 46 | BRIP1_ex20 | 470.4    | 1.007                             |
| 47 | Ref.2q33   | 486.3    | 1.009                             |

(D)

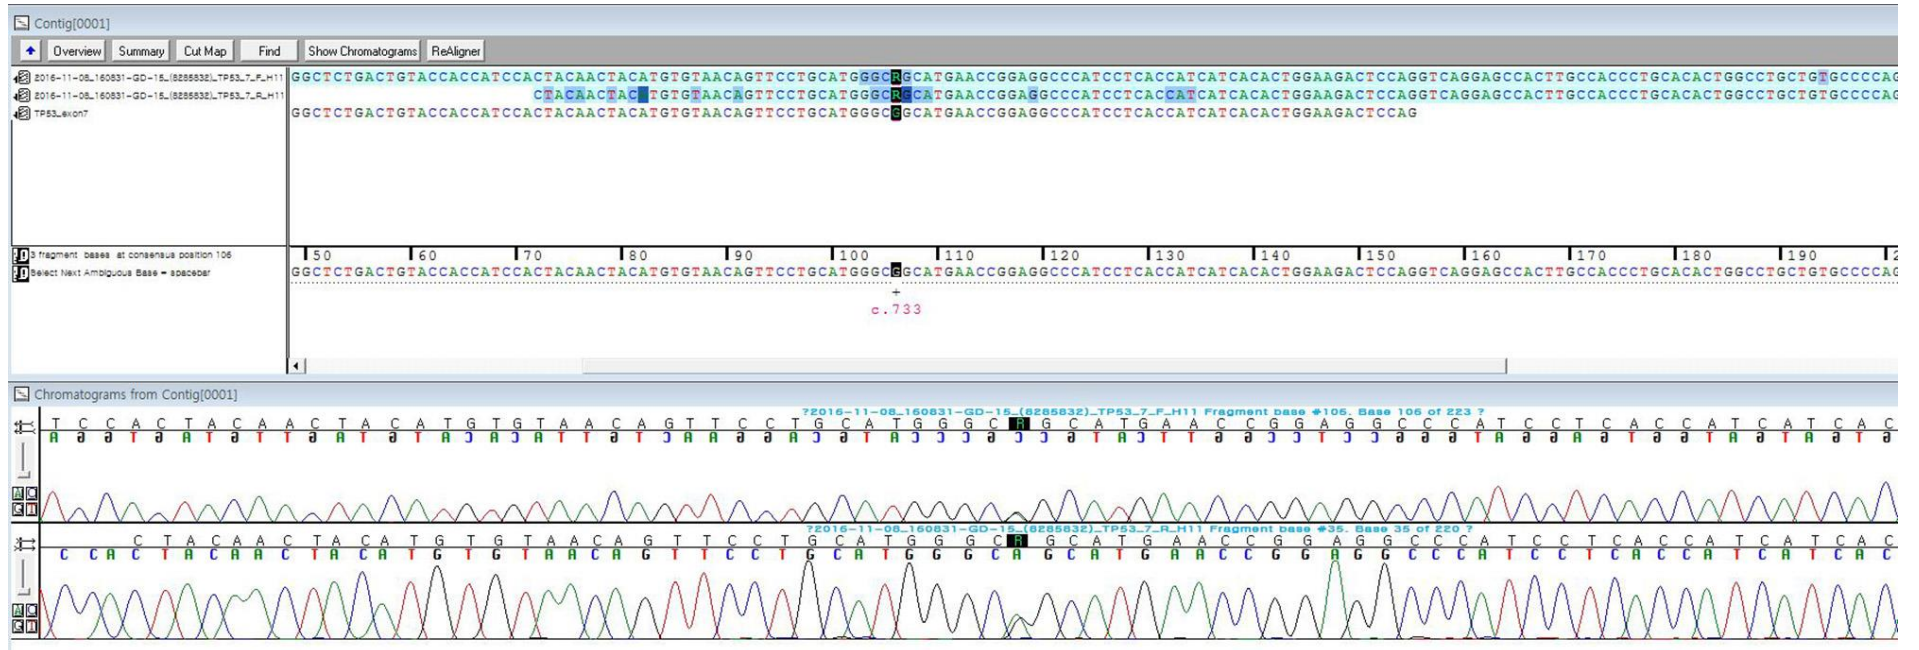

Supplement: MOESM1 [file 15368618]
